## RETRACTION

### Blood Conservation Techniques and Platelet Function in Cardiac Surgery: Retraction

The article by Boldt *et al.*, entitled “Blood Conservation Techniques and Platelet Function in Cardiac Surgery,” from the September 1991 issue of *ANESTHESIOLOGY*, has been retracted in its entirety by agreement between the Journal Editor-in-Chief, James C. Eisenach, M.D., and Wolters Kluwer. This article is being retracted following an investigation at Justus Liebig University, Giessen, Germany, which concluded that Dr. Boldt manipulated and falsified the data in this article.

#### Reference

Boldt J, Zickmann B, Czeke A, Herold C, Dapper F, Hempelmann G: Blood conservation techniques and platelet function in cardiac surgery. *ANESTHESIOLOGY* 1991; 75:426–32

## ERRATUM

### The Quaternary Lidocaine Derivative, QX-314, Exerts Biphasic Effects on Transient Receptor Potential Vanilloid Subtype 1 Channels *In Vitro*: Erratum

In the article beginning on page 1425 of the June 2011 issue, the TRPV1 channel clone is falsely qualified as being human. The experiments were performed on the rat clone rather than the human clone of TRPV1.

Although the erratum was submitted by the authors in 2011, there was a delay in publication.

#### Reference

Rivera-Acevedo RE, Pless SA, Ahern CA, Schwarz SKW: The quaternary lidocaine derivative, QX-314, exerts biphasic effects on transient receptor potential vanilloid subtype 1 channels *in vitro*. *ANESTHESIOLOGY* 2011; 114:1425–34

## ERRATUM

### Future of Anesthesiology Is Perioperative Medicine: A Call for Action: Erratum

In the article beginning on page 1192 of the June 2015 issue, the American Board of Anesthesiology and the Accreditation Council for Graduate Medical Education were incorrectly presented as the American Board of Anesthesiologists and the American College of Graduate Medical Education, respectively.

#### Reference

Kain ZN, Fitch JCK, Kirsch JR, Mets B, Pearl RG: Future of anesthesiology is perioperative medicine: A call for action. *ANESTHESIOLOGY* 2015; 122:1192–5
